# Supplementary material for: Unravelling the Antifungal Effect of Red Thyme Oil (Thymus vulgaris L.) Compounds in Vapor Phase
Source: PubMed Central journal article supplement (PMC7587587; doi:10.3390/molecules25204761), 2020-10-16
Supplement: molecules-25-04761-s001.pdf [file molecules-25-04761-s001.pdf]

1 **Supplementary results**

2 **Table S1.** Percentages of reduction (%) in fungal biomass of different strains after exposure (72 h at  
 3 25 °C) to different concentrations of thymol, p-cymene and  $\gamma$ -terpinene diluted in n-hexane at 50%  
 4 (w/v or v/v).

|                     | Concentration ( $\mu\text{g/L}$ ) | Percentage of fungal biomass reduction (%) |                                 |                                |                                  |                              |
|---------------------|-----------------------------------|--------------------------------------------|---------------------------------|--------------------------------|----------------------------------|------------------------------|
|                     |                                   | <i>P. digitatum</i><br>ITEM 9569           | <i>P. italicum</i><br>ITEM 9571 | <i>B. cinerea</i><br>ITEM 5154 | <i>A. alternata</i><br>ITEM 4215 | <i>M. laxa</i><br>CBS 101507 |
| <b>A</b>            |                                   |                                            |                                 |                                |                                  |                              |
| Thymol              | 102.9                             | 100.0 $\pm$ 0.0a                           | 100.0 $\pm$ 0.0a                | 100.0 $\pm$ 0.0a               | 100.0 $\pm$ 0.0a                 | 91.9 $\pm$ 7.4a              |
|                     | 51.4                              | 100.0 $\pm$ 0.0a                           | 100.0 $\pm$ 0.0a                | 100.0 $\pm$ 0.0a               | 100.0 $\pm$ 0.0a                 | 77.7 $\pm$ 10.2b             |
|                     | 25.7                              | 60.1 $\pm$ 1.1b                            | 100.0 $\pm$ 0.0a                | 100.0 $\pm$ 0.0a               | 100.0 $\pm$ 0.0a                 | 62.0 $\pm$ 8.7b              |
|                     | 12.8                              | 59.0 $\pm$ 3.3b                            | 74.5 $\pm$ 10.2b                | 100.0 $\pm$ 0.0a               | 100.0 $\pm$ 0.0a                 | 54.3 $\pm$ 7.3c              |
|                     | 6.4                               | 42.4 $\pm$ 2.1c                            | n.d.                            | n.d.                           | 91.3 $\pm$ 8.3a                  | 40.0 $\pm$ 5.4c              |
|                     | 3.2                               | 10.2 $\pm$ 1.3d                            | n.d.                            | n.d.                           | 89.2 $\pm$ 8.6a                  | 35.5 $\pm$ 3.9c              |
|                     | 1.6                               | 9.6 $\pm$ 1.4d                             | n.d.                            | n.d.                           | 86.3 $\pm$ 10.3a                 | 37.5 $\pm$ 3.8c              |
|                     | MIC ( $\mu\text{g/L}$ )           | 6.4                                        | 12.8                            | 12.8                           | 1.6                              | 1.6                          |
| <b>B</b>            |                                   |                                            |                                 |                                |                                  |                              |
| p-cymene            | 80.0                              | 63.4 $\pm$ 2.5a                            | 46.8 $\pm$ 6.1a                 | 100.0 $\pm$ 0.0                | 15.2 $\pm$ 1.1                   | 100.0 $\pm$ 0.0a             |
|                     | 40.0                              | 69.3 $\pm$ 2.4a                            | 46.8 $\pm$ 5.3a                 | n.d.                           | n.d.                             | 100.0 $\pm$ 0.0a             |
|                     | 20.0                              | 28.7 $\pm$ 3.2b                            | n.d.                            | n.d.                           | n.d.                             | 100.0 $\pm$ 0.0a             |
|                     | 10.0                              | n.d.                                       | n.d.                            | n.d.                           | n.d.                             | n.d.                         |
|                     | 5.0                               | n.d.                                       | n.d.                            | n.d.                           | n.d.                             | n.d.                         |
|                     | MIC ( $\mu\text{g/L}$ )           | 20.0                                       | 40.0                            | 80.0                           | -                                | 20.0                         |
| <b>C</b>            |                                   |                                            |                                 |                                |                                  |                              |
| $\gamma$ -terpinene | 45.5                              | 100.0 $\pm$ 0.0a                           | 100.0 $\pm$ 0.0a                | 100.0 $\pm$ 0.0a               | 10.8 $\pm$ 1.5a                  | 100.0 $\pm$ 0.0a             |
|                     | 22.8                              | n.d.                                       | 62.5 $\pm$ 7.9b                 | 77.8 $\pm$ 8.9b                | 12.3 $\pm$ 1.8a                  | 100.0 $\pm$ 0.0a             |
|                     | 11.4                              | n.d.                                       | n.d.                            | 10.6 $\pm$ 2.9c                | 9.4 $\pm$ 1.2a                   | n.d.                         |
|                     | 5.7                               | n.d.                                       | n.d.                            | 13.1 $\pm$ 1.4c                | n.d.                             | n.d.                         |
|                     | 2.8                               | n.d.                                       | n.d.                            | 11.1 $\pm$ 1.7c                | n.d.                             | n.d.                         |
|                     | MIC ( $\mu\text{g/L}$ )           | 45.5                                       | 22.8                            | 22.8                           | -                                | 22.8                         |

5 n.d.: not detected (growth not different from control); One way- ANOVA was applied to estimate  
 6 the effect of thymol concentration on fungal biomass reduction; the least significant difference post-  
 7 hoc test ( $p \leq 0.05$ ) was applied to separate mean values for each strain. Mean values with different  
 8 lowercase letters differ significantly ( $p \leq 0.05$ ).

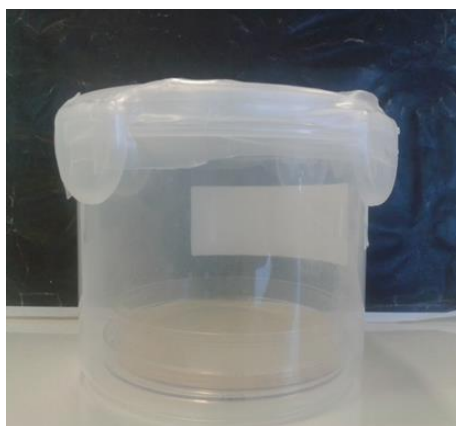

9  
 10 **Figure 1.** Plastic box of 600 mL used to evaluate the antifungal action of RTOCs in vapour phase.

11

## RTO composition

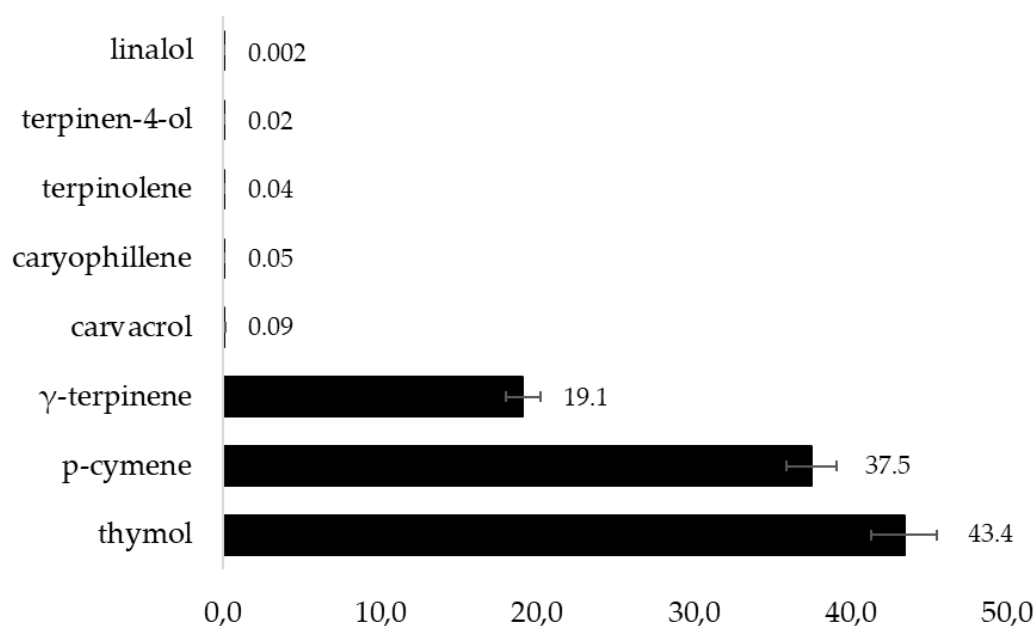

12

13 **Figure S2.** Chemical composition (expressed as % of each compound) of liquid RTO achieved  
 14 through GC-MS analysis.

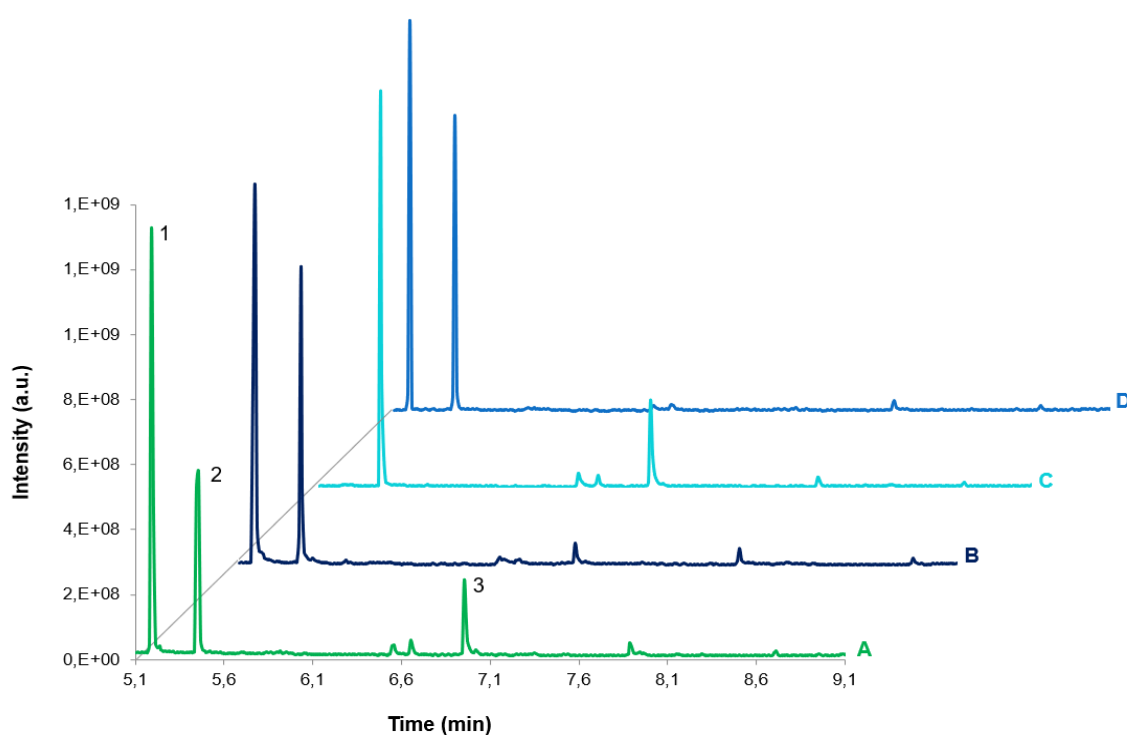

15

16 **Figure S3.** Representative chromatograms of samples. Peak 1: p-cymene, peak 2: γ-terpinene, peak  
 17 3: thymol. A: p-cymene  $0.70 \pm 0.01$  L/L, γ-terpinene  $0.29 \pm 0.01$  L/L and thymol  $0.008 \pm 0.002$  L/L. B:  
 18 p-cymene  $0.55 \pm 0.01$  L/L, γ-terpinene  $0.45 \pm 0.01$  L/L and thymol  $0.0010 \pm 0.0003$  L/L. C: γ-terpinene  
 19  $0.990 \pm 0.030$  L/L and thymol  $0.013 \pm 0.003$  L/L. D: p-cymene  $0.56 \pm 0.02$  L/L and γ-terpinene  $0.44 \pm$   
 20  $0.01$  L/L.

21
